# Supplementary material
Source: PubMed Central journal article supplement (PMC4893963)
Supplement: NIHMS784211-supplement-SI.pdf [file NIHMS784211-supplement-SI.pdf]

## Supporting Information

### Photocatalytic Oxygenation of Substrates by Dioxygen with Protonated Manganese(III) Corrolazine

*Jieun Jung,<sup>†</sup> Heather M. Neu,<sup>‡</sup> Pannee Leeladee,<sup>‡</sup> Maxime A. Siegler,<sup>‡</sup> Kei Ohkubo,<sup>§</sup> David P. Goldberg,<sup>\*,‡</sup> and Shunichi Fukuzumi<sup>\*,†,§,||</sup>*

<sup>†</sup>*Department of Chemistry and Nano Science, Ewha Womans University, Seoul 120-750, Korea*

<sup>‡</sup>*Department of Chemistry, The Johns Hopkins University, 3400 North Charles Street, Baltimore, Maryland 21218, United States*

<sup>§</sup>*Department of Material and Life Science, Graduate School of Engineering, Osaka University, ALCA and SENTAN, Japan Science and Technology Agency (JST), Suita, Osaka 565-0871, Japan*

<sup>||</sup>*Faculty of Science and Engineering, Meijo University, ALCA and SENTAN, Japan Science and Technology Agency (JST), Nagoya, Aichi 468-0073, Japan*

E-mail: fukuzumi@chem.eng.osaka-u.ac.jp, dpg@jhu.edu

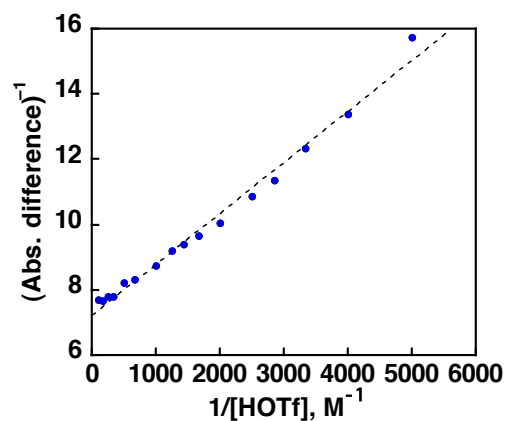

**Figure S1.** Plot of  $(\Delta\text{Abs.})^{-1}$  vs  $[\text{HOTf}]^{-1}$  to determine the second binding constant ( $K_2 = \frac{[\text{Mn}^{\text{III}}(\text{OTf})(\text{H}_2\text{O})(\text{TBP}_8\text{Cz}(\text{H})_2)][\text{OTf}]}{[\text{Mn}^{\text{III}}(\text{OTf})(\text{TBP}_8\text{Cz}(\text{H}))][\text{H}^+]}$ ) upon addition of HOTf ( $0.0 - 1.0 \times 10^{-2}$  M) into the solution of  $\text{Mn}^{\text{III}}(\text{OTf})(\text{TBP}_8\text{Cz}(\text{H}))$  ( $1.0 \times 10^{-5}$  M) in PhCN.

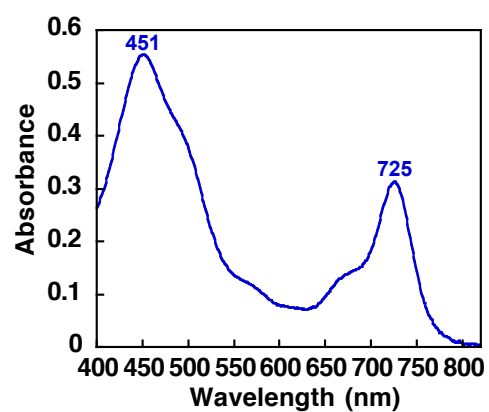

**Figure S2.** (a) UV-vis spectrum of crystalline  $[\text{Mn}^{\text{III}}(\text{OTf})(\text{TBP}_8\text{Cz}(\text{H}))]$  dissolved in PhCN (2.0 mL) at 23 °C.

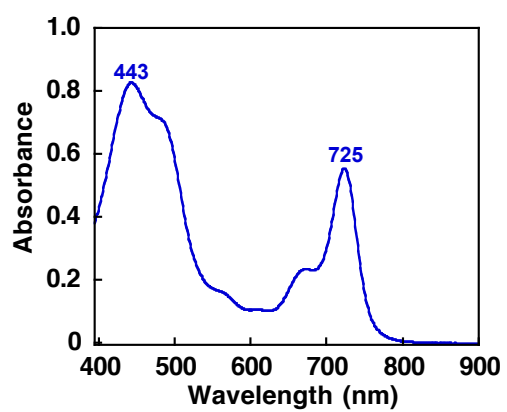

**Figure S3.** (a) UV-vis spectrum of crystalline [Mn<sup>III</sup>(OTf)(TBP<sub>8</sub>Cz(H))] dissolved in CH<sub>2</sub>Cl<sub>2</sub> (2.0 mL) at 23 °C.

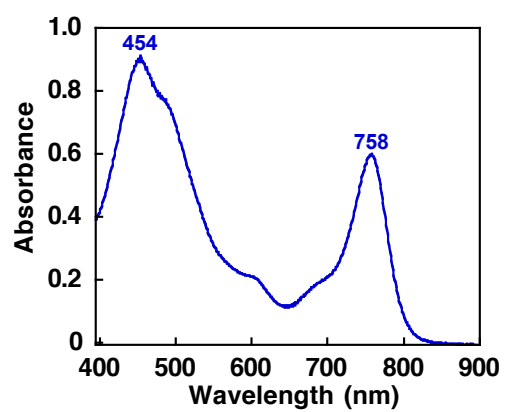

**Figure S4.** (a) UV-vis spectrum of crystalline  $[\text{Mn}^{\text{III}}(\text{OTf})(\text{H}_2\text{O})(\text{TBP}_8\text{Cz}(\text{H})_2)][\text{OTf}]$  dissolved in  $\text{CH}_2\text{Cl}_2$  (2.0 mL) at 23 °C.

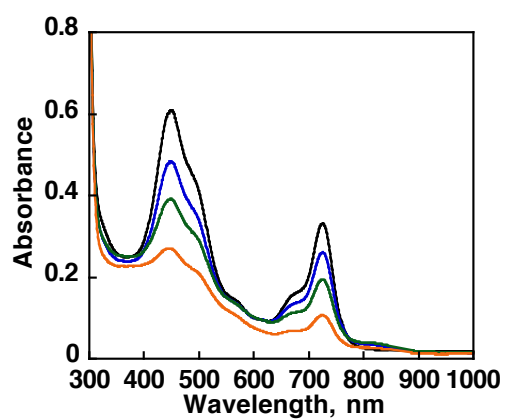

**Figure S5.** UV-vis spectral change of Mn<sup>III</sup>(OTf)(TBP<sub>8</sub>Cz(H)) ( $1.0 \times 10^{-5}$  M) during photocatalytic oxidation reaction [black: 0 h, blue: 2 h, green: 4 h, and orange: 6 h] of HMB (0.3 M) in the presence of  $4.0 \times 10^{-5}$  M of HOTf under photoirradiation (white light) in an O<sub>2</sub>-saturated PhCN solution at room temperature.

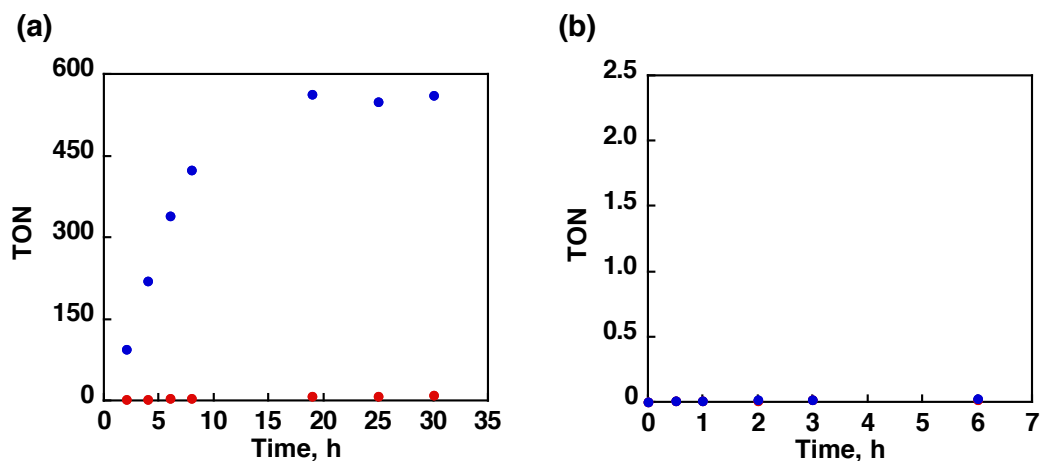

**Figure S6.** Time profiles of the amount of produced pentamethylbenzyl alcohol for photocatalytic oxidation reaction of HMB (0.3 M) by  $(\text{TBP}_8\text{Cz})\text{Mn}^{\text{III}}$  ( $1.0 \times 10^{-5}$  M) (a) in the presence of  $4.0 \times 10^{-5}$  M of HOTf or (b) in the presence of  $5.0 \times 10^{-3}$  M of HOTf under photoirradiation (white light) in an  $\text{O}_2$ -saturated PhCN solution at room temperature.

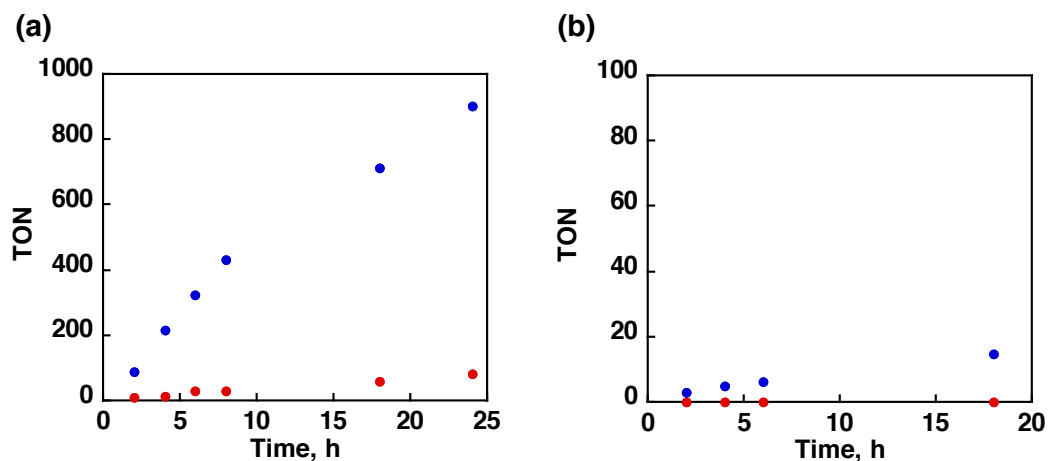

**Figure S7.** Time profiles of the amount of products [methylphenylsulfoxide (blue) and methylphenylsulfone (red)] for photocatalytic oxidation reaction of thioanisole ( $2.0 \times 10^{-2}$  M) by  $\text{Mn}^{\text{III}}(\text{TBP}_8\text{Cz})$  ( $1.0 \times 10^{-5}$  M) (a) in the presence of HOTf ( $2.0 \times 10^{-5}$  M) and (b) in the absence of HOTf under photoirradiation (white light) in an  $\text{O}_2$ -saturated PhCN at room temperature.



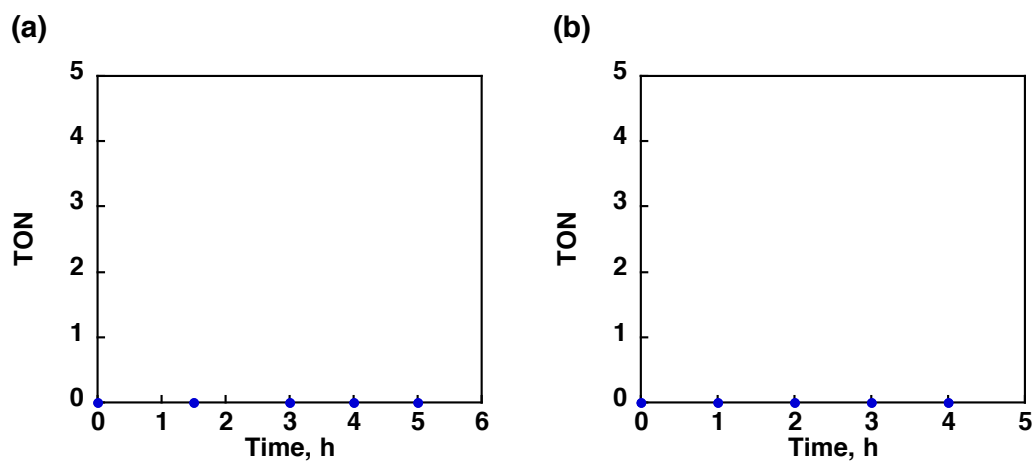

**Figure S8.** Time profiles of the amount of methylphenylsulfoxide for (a) photocatalytic reaction of thioanisole ( $2.0 \times 10^{-2}$  M) in the presence of HOTf ( $2.0 \times 10^{-5}$  M) under photoirradiation (white light) in  $O_2$ -saturated PhCN at room temperature and (b) the reaction of thioanisole ( $2.0 \times 10^{-2}$  M) by  $Mn^{III}(TBP_8Cz)$  ( $1.0 \times 10^{-5}$  M) in the presence of HOTf ( $2.0 \times 10^{-5}$  M) without photoirradiation in  $O_2$ -saturated PhCN at room temperature.

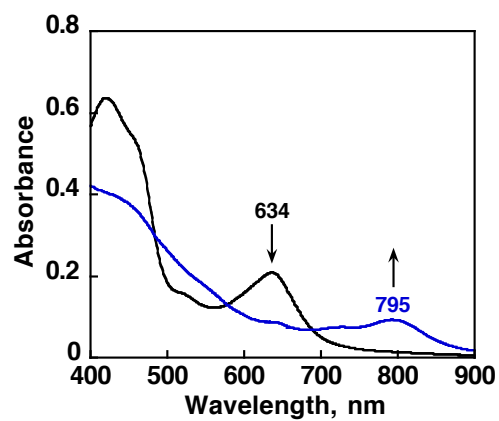

**Figure S9.** (a) UV-vis spectral changes from  $\text{Mn}^{\text{V}}(\text{O})(\text{TBP}_8\text{Cz})$  (black line,  $1.0 \times 10^{-5} \text{ M}$ ) to  $[\text{Mn}^{\text{IV}}(\text{OH})(\text{TBP}_8\text{Cz}^+)](\text{OTf})$  in the presence of HOTf (blue line,  $2.0 \times 10^{-4} \text{ M}$ ) in PhCN at room temperature.

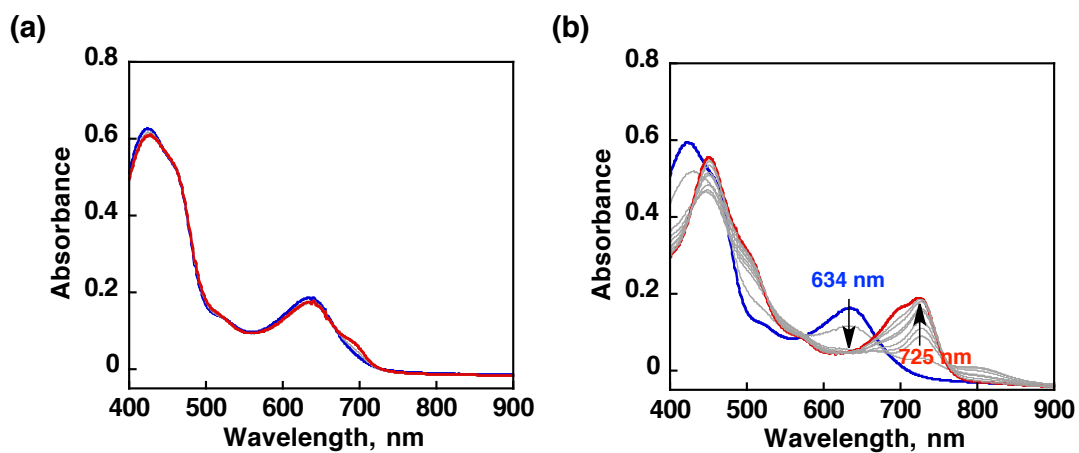

**Figure S10.** UV-vis spectral changes from  $\text{Mn}^{\text{V}}(\text{O})(\text{TBP}_8\text{Cz})$  (blue line,  $1.0 \times 10^{-5} \text{ M}$ ) with HMB ( $2.0 \times 10^{-2} \text{ M}$ ) to  $\text{Mn}^{\text{III}}(\text{OTf})(\text{TBP}_8\text{Cz}(\text{H}))$  (red line) (a) in the absence of HOTf and (b) upon addition of HOTf ( $2.0 \times 10^{-5} \text{ M}$ ) in a PhCN solution for 1 h at room temperature.

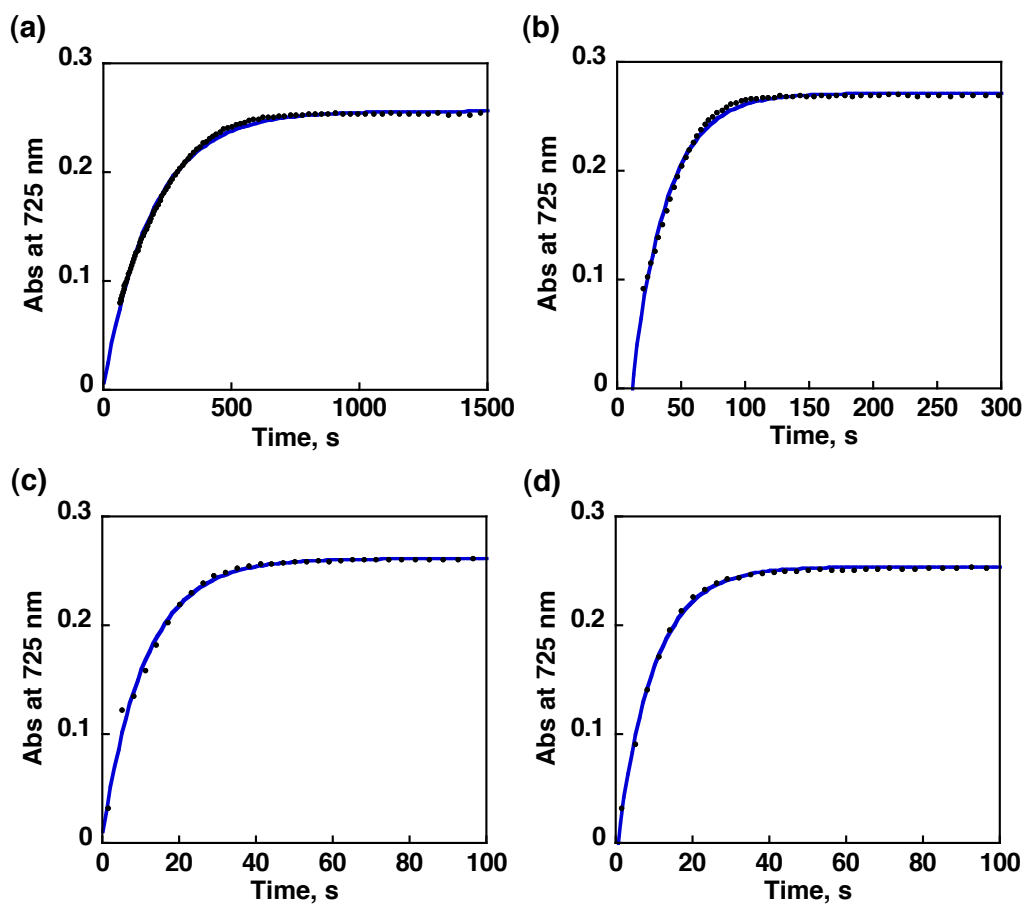

**Figure S11.** Plots of formed  $\text{Mn}^{\text{III}}(\text{OTf})(\text{TBP}_8\text{Cz}(\text{H}))$  ( $\lambda_{\text{max}} = 725 \text{ nm}$ ) versus time and best-fit lines to give pseudo-first-order rate constant ( $k_{\text{obs}}$ ) of the reduction reaction of  $[\text{Mn}^{\text{IV}}(\text{OH})(\text{TBP}_8\text{Cz}^+)](\text{OTf})$  ( $1.0 \times 10^{-5} \text{ M}$ ) with HMB ( $2.0 \times 10^{-2} \text{ M}$ ) in PhCN containing (a)  $20 \mu\text{M}$ , (b)  $40 \mu\text{M}$ , (c)  $80 \mu\text{M}$ , and (d)  $90 \mu\text{M}$  of HOTf.

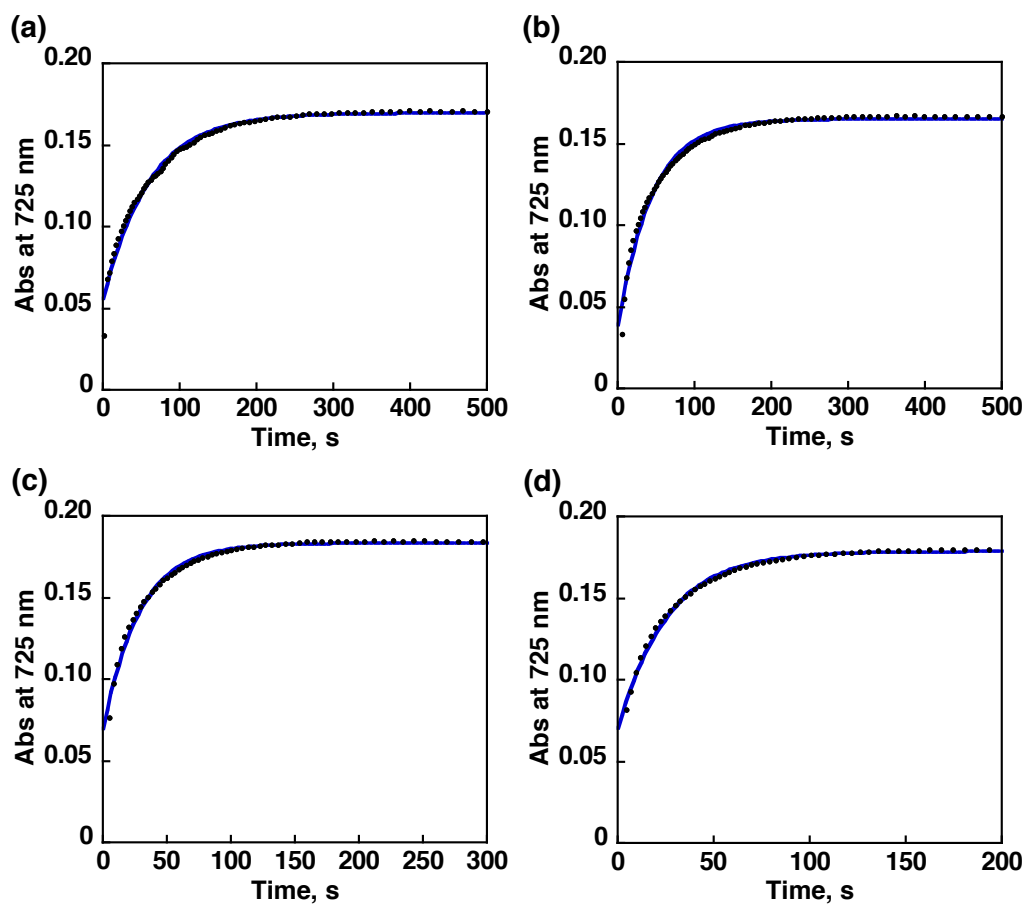

**Figure S12.** Plots of formed  $\text{Mn}^{\text{III}}(\text{OTf})(\text{TBP}_8\text{Cz}(\text{H}))$  ( $\lambda_{\text{max}} = 725 \text{ nm}$ ) versus time and best-fit lines to give pseudo-first-order rate constant ( $k_{\text{obs}}$ ) of the reduction reaction of  $[\text{Mn}^{\text{IV}}(\text{OH})(\text{TBP}_8\text{Cz}^+)](\text{OTf})$  ( $1.0 \times 10^{-5} \text{ M}$ ) with  $\text{HOTf}$  ( $3.0 \times 10^{-5} \text{ M}$ ) in  $\text{PhCN}$  containing (a) 2 mM, (b) 4 mM, (c) 6 mM, and (d) 8 mM of HMB.

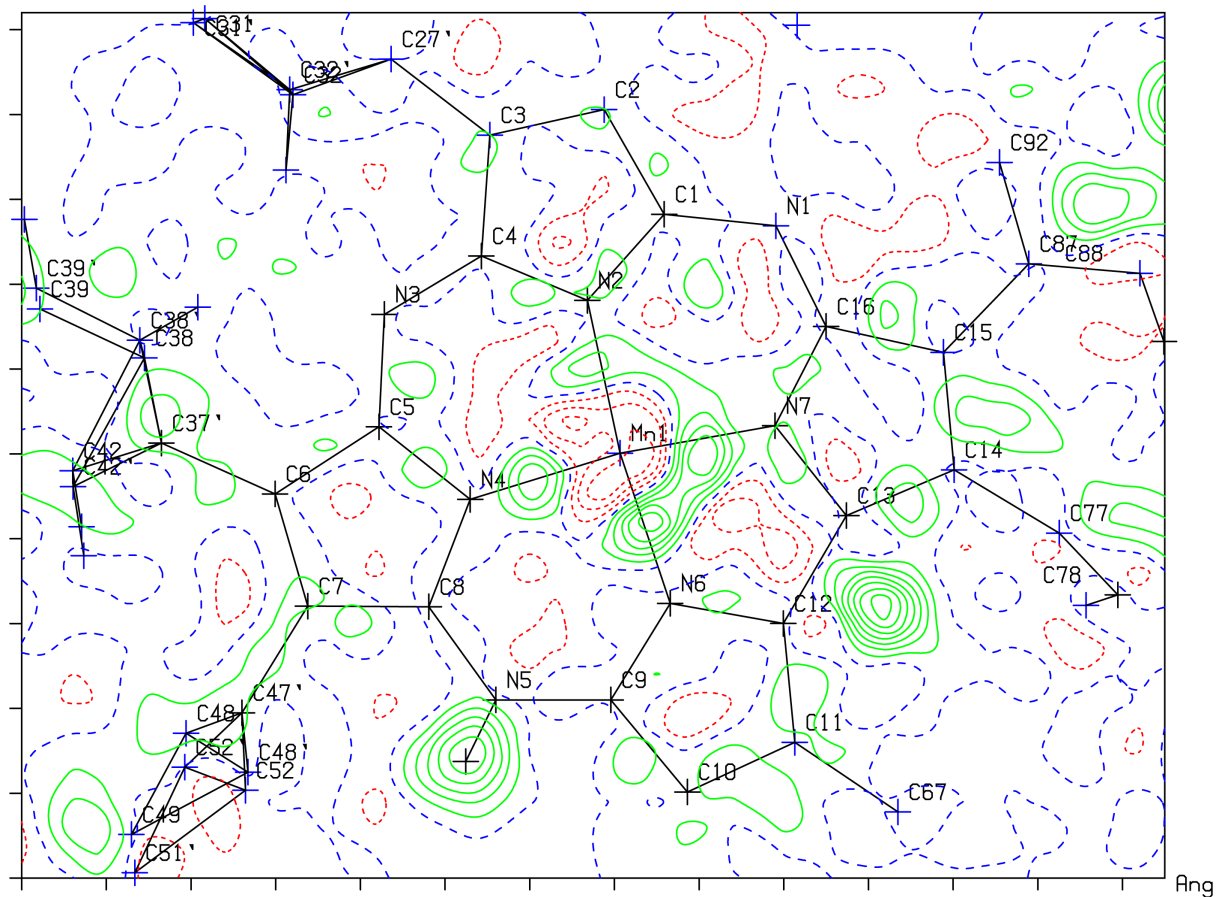

**Figure S13.** Difference Fourier map of Mn<sup>III</sup>(OTf)(TBP<sub>8</sub>Cz(H)) at 110(2) K drawn on the plane of the corrolazine core. N5 is the identified protonated site.
